# Supplementary material for: Governing the crystallographic sites for tuning Eu2+ emission in an apatite oxyfluoride host to be applied for superior white light emitting diodes
Source: Royal Society of Chemistry journal article supplement (doi:10.1039/d2dt02236b), 2022-01-01
Supplement: d2dt02236b1.pdf [file d2dt02236b1.pdf]

## Supporting information

### Governing the Crystallographic Sites for Tuning Eu<sup>2+</sup> Emission in an Apatite Oxyfluoride Host to be Applied for Superior White Light Emitting Diodes

S. Sreevalsa,<sup>a, f</sup> Shahzad Ahmad,<sup>b</sup> Partha Kundu,<sup>c, f</sup> Mukesh Kumar Pandey,<sup>d</sup> Sudipta Som,<sup>e</sup>  
Subrata Das<sup>a, f, \*</sup>

<sup>a</sup>. Materials Science and Technology Division, CSIR – National Institute for Interdisciplinary Science and Technology, Thiruvananthapuram, Kerala, 695019, India.

<sup>b</sup>. Department of Chemistry, Zakir Husain Delhi College, University of Delhi, Delhi, 110002, India.

<sup>c</sup>. Environmental Technology Division, CSIR-National Institute for Interdisciplinary Science and Technology (CSIR-NIIST), Thiruvananthapuram, Kerala, 695019, India

<sup>d</sup>. Department of Physics, National Taiwan University, Taipei, 10617, Taiwan

<sup>e</sup>. Department of Chemical Engineering, National Taiwan University, Taipei, 10617, Taiwan

<sup>f</sup>. Academy of Scientific and Innovative Research (AcSIR), Ghaziabad, 201002, India

**\* Corresponding author's email: [subratadas@niist.res.in](mailto:subratadas@niist.res.in) (S. Das)**

## Supporting information

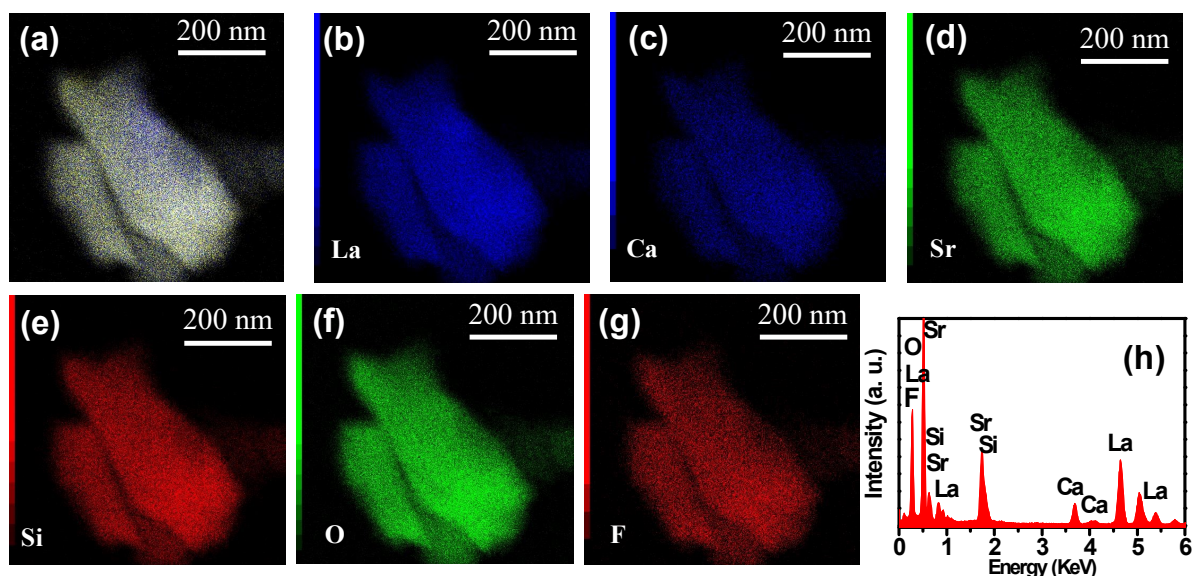

**Fig. S1** (a) TEM spectrum, (b-g) elemental mapping images, and (h) EDX spectra of CSLOF.

**Table S1** Rietveld refined lattice parameters of CLOF, CLOF: 0.04Eu<sup>2+</sup>, CSLOF, CSLOF: 0.04Eu<sup>2+</sup> and CSLOF: 0.04Eu<sup>2+</sup>;1.2Ba<sup>2+</sup>.

| Formula             | CLOF           | CLOF:0.04Eu <sup>3+</sup> | CSLOF          | CSLOF:0.04Eu <sup>2+</sup> | CSLOF:0.04Eu <sup>2+</sup><br>;1.2Ba <sup>2+</sup> |
|---------------------|----------------|---------------------------|----------------|----------------------------|----------------------------------------------------|
| Structure           | Hexagonal      | Hexagonal                 | Hexagonal      | Hexagonal                  | Hexagonal                                          |
| Space group         | P 63/m (# 176) | P 63/m (# 176)            | P 63/m (# 176) | P 63/m (# 176)             | P 63/m (# 176)                                     |
| a = b [Å]           | 9.6553 (3)     | 9.6494 (5)                | 9.6855 (5)     | 9.6902 (4)                 | 9.7247 (2)                                         |
| c [Å]               | 7.1224 (1)     | 7.1202 (2)                | 7.1622 (8)     | 7.1649 (5)                 | 7.2090 (3)                                         |
| v [Å <sup>3</sup> ] | 575.03 (1)     | 574.15 (6)                | 582.19 (7)     | 582.65 (1)                 | 590.42 (3)                                         |
| Z                   | 2              | 2                         | 2              | 2                          | 2                                                  |
| χ <sup>2</sup>      | 1.527          | 2.171                     | 5.323          | 3.856                      | 3.234                                              |
| R <sub>p</sub> (%)  | 3.76           | 4.94                      | 5.57           | 6.02                       | 5.44                                               |
| R <sub>wp</sub> (%) | 4.98           | 6.59                      | 9.13           | 8.58                       | 8.67                                               |
| GOF (S)             | 1.24           | 1.47                      | 2.31           | 1.96                       | 1.80                                               |
| Temperature         | 298 K          | 298 K                     | 298 K          | 298 K                      | 298 K                                              |

## Supporting information

**Table S2** The atomic coordinates and fractional occupancies of CLOF and CSLOF hosts

| Atom         | Wyck. pos. | x           | y            | z           | $U_{\text{iso}}$ | Occ.   |
|--------------|------------|-------------|--------------|-------------|------------------|--------|
| <b>CLOF</b>  |            |             |              |             |                  |        |
| La1          | 6h         | 0.23691 (3) | -0.01380     | 1/4         | 0.0176 (2)       | 0.75   |
| Ca1          | 6h         | 0.23691 (3) | -0.01380     | 1/4         | 0.0176 (2)       | 0.25   |
| La2          | 4f         | 2/3         | 1/3          | 0.00238 (9) | 0.0046 (1)       | 0.375  |
| Ca2          | 4f         | 2/3         | 1/3          | 0.00238 (9) | 0.0046 (1)       | 0.625  |
| Si           | 6h         | 0.39769 (4) | 0.36628 (1)  | 1/4         | 0.0215 (4)       | 1.0    |
| O1           | 6h         | 0.58661 (8) | 0.47220 (4)  | 1/4         | 0.0249 (8)       | 1.0    |
| O2           | 6h         | 0.33204 (5) | 0.48359 (2)  | 1/4         | 0.0087 (4)       | 1.0    |
| O3           | 12i        | 0.34109 (1) | 0.26277 (4)  | 0.06359 (6) | 0.0170 (8)       | 1.0    |
| F            | 2a         | 0           | 0            | 1/4         | 0.1475 (2)       | 1.0    |
| <b>CSLOF</b> |            |             |              |             |                  |        |
| La1          | 6h         | 0.24120 (6) | -0.01259 (3) | 1/4         | 0.0199 (9)       | 0.75   |
| Ca1          | 6h         | 0.24120 (6) | -0.01259 (3) | 1/4         | 0.0199 (9)       | 0.125  |
| Sr1          | 6h         | 0.24120 (6) | -0.01259 (3) | 1/4         | 0.0199 (9)       | 0.125  |
| La2          | 4f         | 2/3         | 1/3          | 0.00198 (3) | 0.0057 (6)       | 0.375  |
| Ca2          | 4f         | 2/3         | 1/3          | 0.00198 (3) | 0.0057 (6)       | 0.3125 |
| Sr2          | 4f         | 2/3         | 1/3          | 0.00198 (3) | 0.0057 (6)       | 0.3125 |
| Si           | 6h         | 0.39272 (5) | 0.35948 (9)  | 1/4         | 0.0220 (5)       | 1.0    |
| O1           | 6h         | 0.57470 (2) | 0.45330 (2)  | 1/4         | 0.0463 (5)       | 1.0    |
| O2           | 6h         | 0.33411 (1) | 0.48183 (8)  | 1/4         | 0.0385 (4)       | 1.0    |
| O3           | 12         | 0.34445 (9) | 0.25447 (1)  | 0.05584 (6) | 0.0196 (3)       | 1.0    |
| F            | 2          | 0           | 0            | 1/4         | 0.0598 (8)       | 1.0    |
